# Supplementary material
Source: PubMed Central journal article supplement (PMC3810020)
Supplement: NIHMS509477-supplement-Figure.pdf [file NIHMS509477-supplement-Figure.pdf]

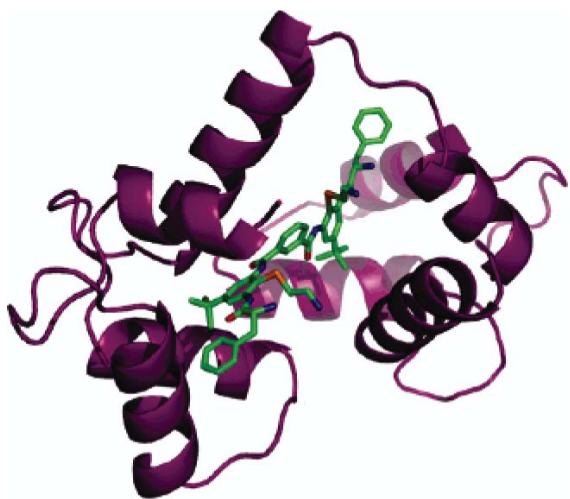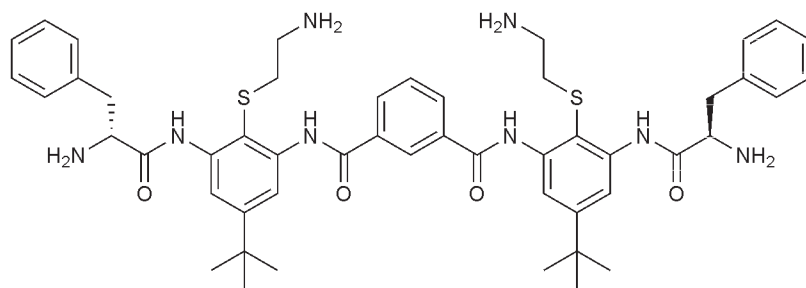

Supplementary Figure 1. Model of the interaction between a designed arylamide (smMLCK mimic) and calmodulin. The natural smMLCK helix contains both positively charged and hydrophobic residues that are important for recognition, and are recaptured in the arylamide. Reprinted with permission from ref. 125. Copyright (2006) American Chemical Society.
