# Supplementary material
Source: PubMed Central journal article supplement (PMC3810020)
Supplement: NIHMS509477-supplement-Table.pdf [file NIHMS509477-supplement-Table.pdf]

Supplementary Table 1. Interactions of non-natural foldamers with biological targets.

| Target to be bound or inhibited                 | Natural counterpart               | Foldamer type    | Potency                        | References     |
|-------------------------------------------------|-----------------------------------|------------------|--------------------------------|----------------|
| Oligonucleotides (TAR RNA)                      | Tat                               | $\beta$ -peptide | $K_d = 16 \mu\text{M}$         | 7              |
| Heparin                                         | Protamine                         | oligoarylamide   | $K_B = 1.8 \mu\text{M}$        | 26             |
| Membrane/lipid (selective bacterial cell lysis) | Antimicrobial peptides (magainin) | $\beta$ -peptide | MIC = 2 – 8 $\mu\text{g/mL}$   | 22, 25, 74,104 |
|                                                 |                                   | oligoarylamide   | MIC = 1-7 $\mu\text{g/mL}$     | 114,120        |
| hDM2                                            | p53                               | $\beta$ -peptide | $IC_{50} = 11 \mu\text{M}$     | 11, 107, 109   |
| Viral entry                                     | Fuzeon                            | $\beta$ -peptide | $IC_{50} = 4 - 30 \mu\text{M}$ | 14, 10         |
| Bcl-x <sub>L</sub>                              | Bak                               | $\beta$ -peptide | $K_i = 2.2 \text{ nM}$         | 9              |
|                                                 |                                   | oligoarylamide   | $K_i = 0.8 \mu\text{M}$        | 124            |
| Calmodulin                                      | smMLCK                            | oligoarylamide   | $K_i = 7.1 \text{ nM}$         | 125            |
